# Supplementary material for: Behavior and Habitat Use Remain Diverse and Variable in Modern Zoological Exhibits over the Long-Term: Case Studies in 5 Species of Ursidae
Source: MDPI journal article supplement (doi:10.3390/jzbg2040049), 2021-12-10

## Supplementary Material A

Representative photographs of the bear habitats described in this study:

- A. Saint Louis Zoo polar bear habitat (Photo credit: David Powell).

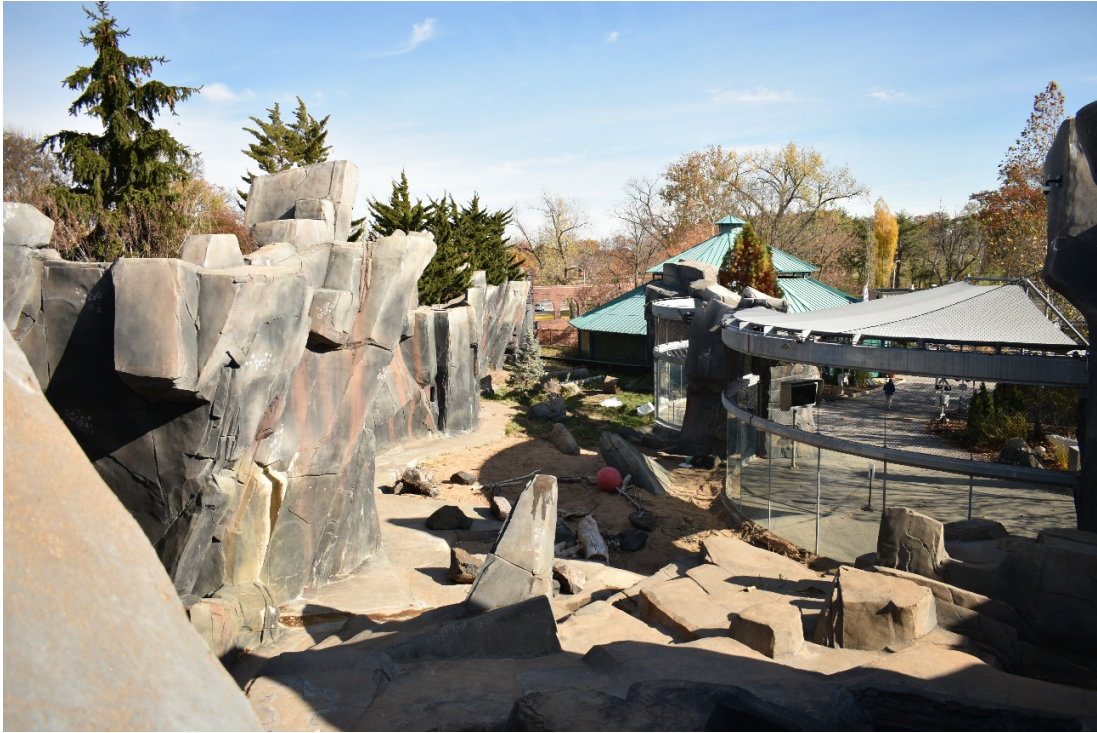

- B. Saint Louis Zoo sun bear habitat (Photo credit: David Powell).

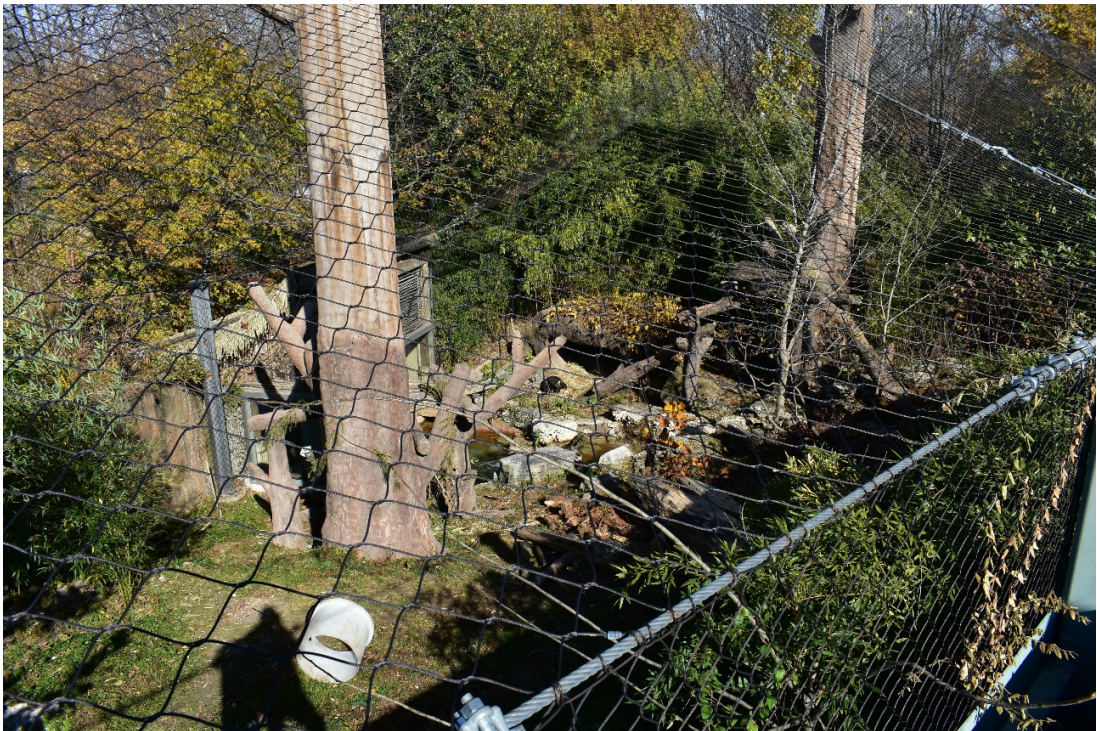



C. Saint Louis Zoo Andean bear habitat (Photo credit: Ray Meibaum)

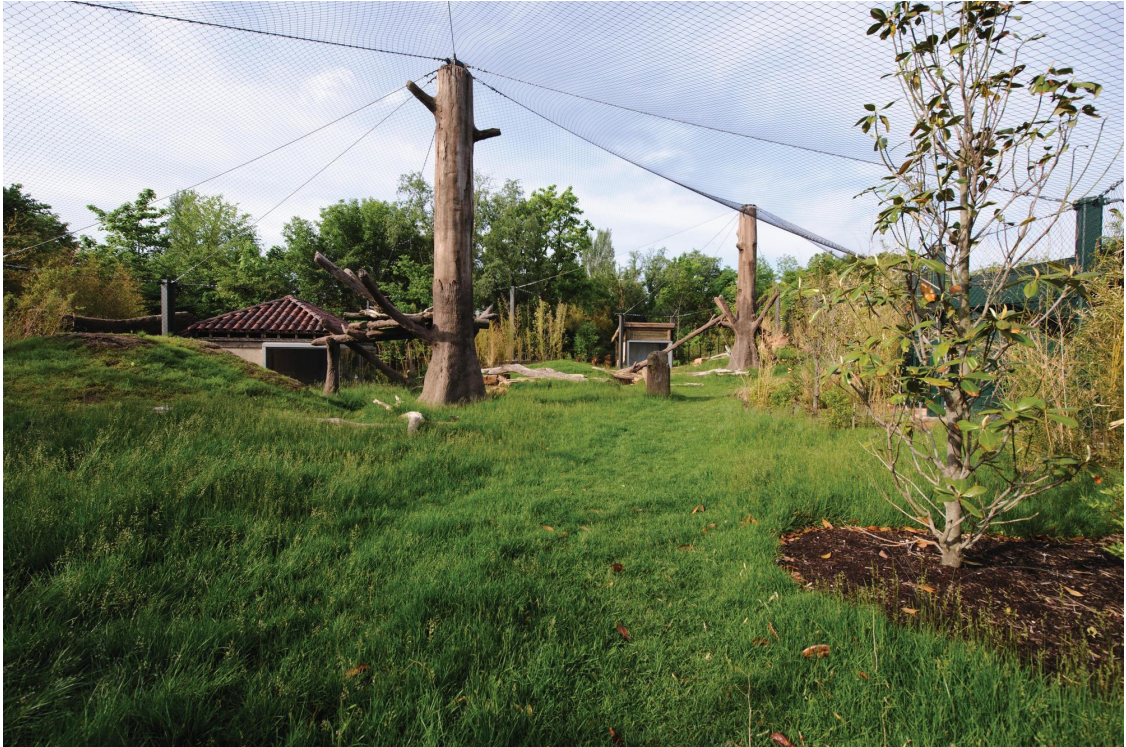

D. Saint Louis Zoo grizzly bear habitat (Photo credit: Roger Brandt)

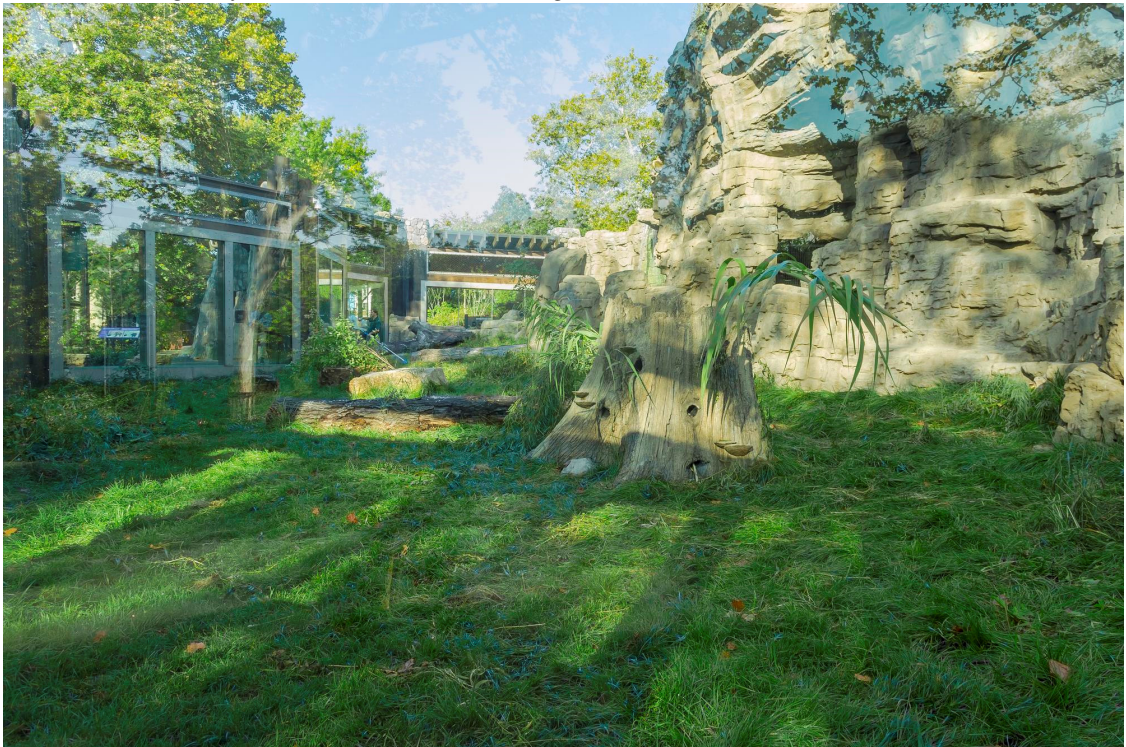

E.



F. Smithsonian National Zoological Park giant panda habitats (Photo credit: Jessie Cohen)

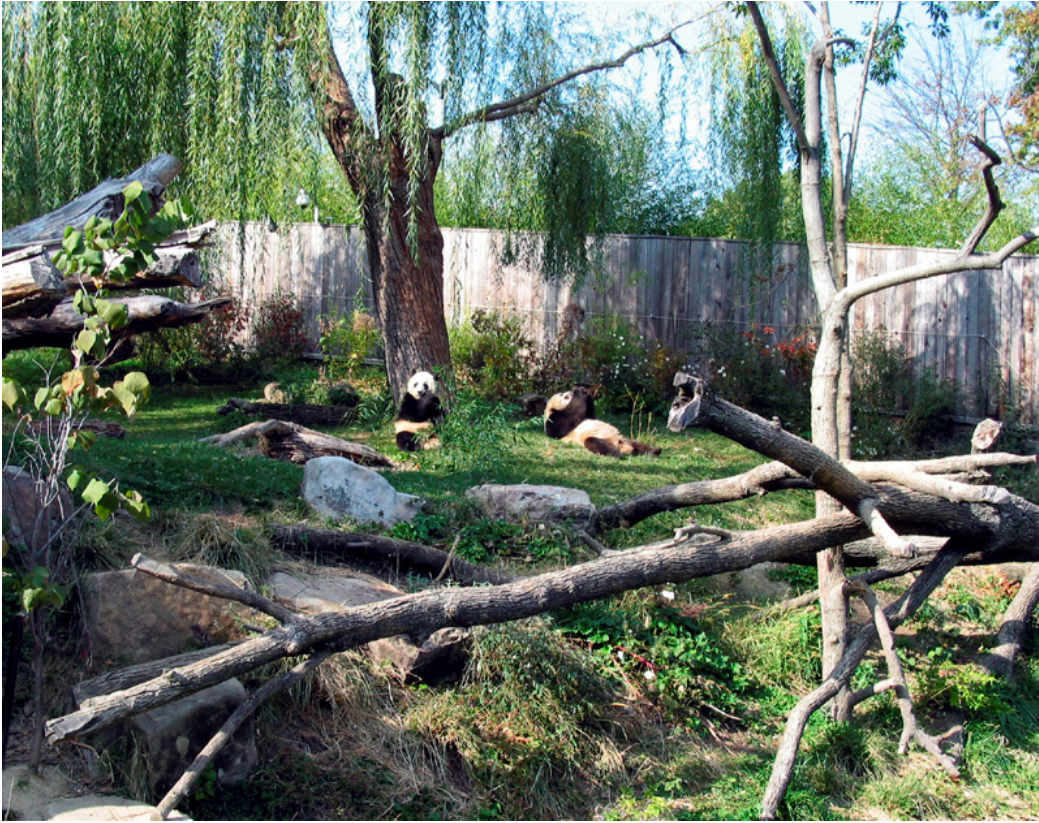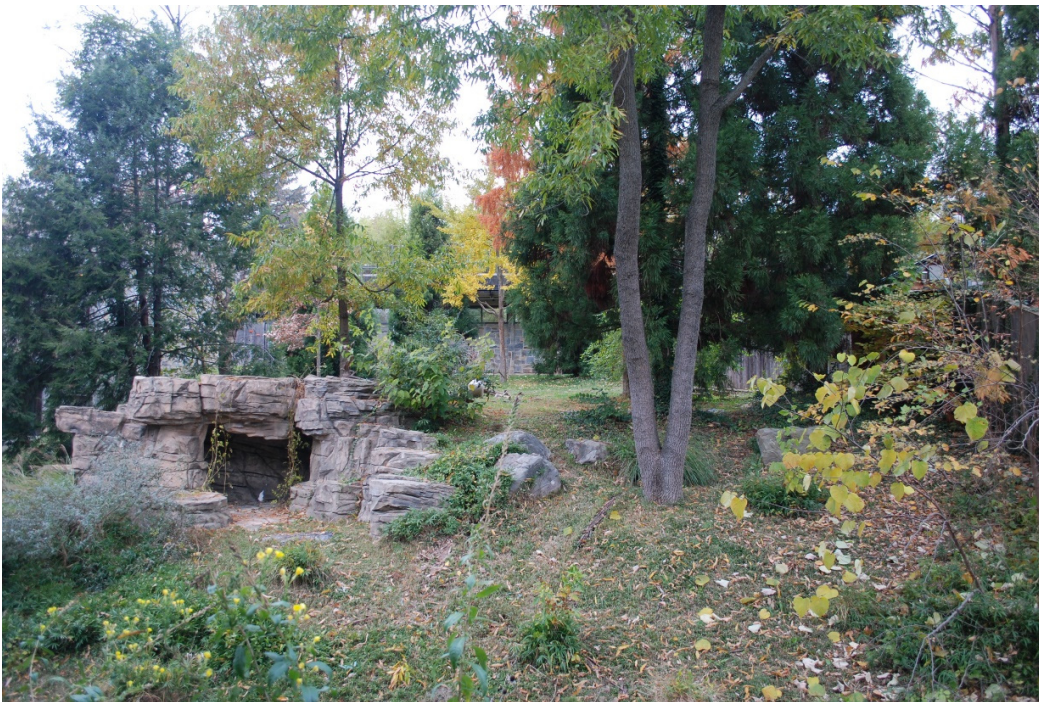

Supplement: s1 [file s1]
