# Supplementary material for: Behavior and Habitat Use Remain Diverse and Variable in Modern Zoological Exhibits over the Long-Term: Case Studies in 5 Species of Ursidae
Source: MDPI journal article supplement (doi:10.3390/jzbg2040049), 2021-12-10
Supplement: s1 [file s1]

Supplementary Material B: Ethogram for Saint Louis Bears

| Category               | Behavior            | Definition                                                                                                                                                                                                                               |
|------------------------|---------------------|------------------------------------------------------------------------------------------------------------------------------------------------------------------------------------------------------------------------------------------|
| Investigation/foraging | Dig                 | Using paws or claws to disturb/displace substrate.                                                                                                                                                                                       |
|                        | Drink               | While not Using Pool, bear has mouth or tongue in contact with water source.                                                                                                                                                             |
|                        | Eat                 | Paws and/or tongue and/or mouth in contact with food object or chewing food object; includes retrieving food from provisioned enrichment device.                                                                                         |
|                        | Object Interaction  | Either carrying, rolling, scent rubbing, nibbling, chewing, shredding, exploring with mouth or sniff/licking a non-food object or other exhibit feature. Includes contact with viewing window.                                           |
| Locomotion             | Locomotion          | Non-repetitive movement regardless of speed at ground level.                                                                                                                                                                             |
|                        | Vertical locomotion | Non-repetitive movement or climbing regardless of speed on log ramps, perches or other elevated features at least one body length in height.                                                                                             |
| Rest                   | Resting             | Stationary at ground level without performing any other behaviors; includes standing or lying down, eyes open or closed.                                                                                                                 |
|                        | Vertical resting    | Stationary on elevated structures, log ramps and perches at least one body length in height without performing any other behaviors; includes standing or lying down, eyes open or closed.                                                |
| Stereotypy             | Pacing              | Repetitive locomotor pattern, either fast or slow, along invariant path for at least 3 complete circuits; may include head-toss.                                                                                                         |
|                        | Paw-Suck            | Own paw is in contact with mouth or tongue without food item or enrichment object.                                                                                                                                                       |
|                        | Repetitive Swimming | Locomotor pattern in water or pool feature with either half or more body immersed and/or half or more paws not in contact with pool bottom or solid surface, either fast or slow, along invariant path for at least 3 complete circuits. |

|              |              |                                                                                                                                                                 |
|--------------|--------------|-----------------------------------------------------------------------------------------------------------------------------------------------------------------|
|              | Swaying      | Repetitive stationary pattern with animal standing and body rocking back and forth at least 3 cycles.                                                           |
| Pool Use     | Use Pool     | Moving or stationary in water or pool feature with either half or more body immersed and/or half or more paws not in contact with pool bottom or solid surface. |
| Out of Sight | Out of Sight | Animal cannot be seen by observer, either due to its position in the habitat or because it is off display.                                                      |
